# Supplementary material
Source: PubMed Central journal article supplement (PMC6355065)
Supplement: fj.201800336R.sf1.pdf [file fj.201800336R.sf1.pdf]

## Figure S1

ATGGAGCACATACAGGGAGCTTGGAAAGACGATCAGCAATGGTTTTGGATTCAAAGATGCCGTGTTTGATG  
GCTCCAGCTGCATCTCTCCTACAATAGTTCAGCAGTTTGGCTATCAGCGCCGGGCATCAGATGATGGCAA  
ACTCACAGATCCTTCTAAGACAAGCAACACTATCCGTGTTTTCTTGCCGAACAAGCAAAGAACAGTGGTG  
AATGTGCGAAATGGAATGAGCTTGCATGACTGCCTTATGAAAGCACTCAAGGTGAGGGGCCTGCAACCAG  
AGTGCTGTGCAGTGTTCAGACTTCTCCACGAACACAAAGGTAAAAAAGCACGCTTAGATTGGAATACTGA  
TGCTGCGTCTTTGATTGGAGAAGAACTTCAAGTAGATTTCTGGATCATGTTCCCTCACAACACACAAC  
TTTGCTCGGAAGACGTTTCTGAAGCTTGCCTTCTGTGACATCTGTCAGAAATTCCTGCTCAATGGATTTC  
GATGTCAGACTTGTGGCTACAAATTTTCATGAGCACTGTAGCACCAAAGTACCTACTATGTGTGTGGACTG  
GAGTAACATCAGACAACCTTTATTGTTTTCAAATTCCTACTATTGGTGATAGTGGAGTCCCAGCACTACCT  
TCTTTGACTATGCGTCGTATGCGAGAGTCTGTTTTCCAGGATGCCTGTTAGTTCTCAGCACAGATATTCTA  
CACCTCACGCCTTCACCTTTAACACCTCCAGTCCCTCATCTGAAGGTTCCCTCTCCAGAGGCAGAGGTC  
GACATCCACACCTAATGTCCACATGGTCAGCACCACCCTGCCTGTGGACAGCAGGATGATTGAGGATGCA  
ATTCGAAGTCACAGCGAATCAGCCTCACCTTCAGCCCTGTCCAGTAGCCCCAACAACTCTGAGCCCAACAG  
GCTGGTCACAGCCGAAAACCCCCGTGCCAGCACAAAGAGAGCGGGCACCAGTATCTGGGACCCAGGAGAA  
AAACAAAATTAGGCCCTCGTGACAGAGAGATTCAAGCTATTATTGGGAAATAGAAGCCAGTGAAGTGATG  
CTGTCCACTCGGATTGGGTGAGGCTCTTTTGGAACTGTTTATAAGGGTAAATGGCACGGATTAGCTGTGG  
GTGTCCCTATCAAACAGGGAAGGCATGACTTAATTTCTGAAATCTATGTGGAATATTAATGTTCTGATTT  
TAATGGAAACACTTTGTCACTTGGAGAAAGGAGATGTTGCAGTAAAGATCCTAAAGGTTGTCGACCCAA  
CCCCAGAGCAATTCAGGCCTTCAGGAATGAGGTGGCTGTTCTGCGCAAAACACGGCATGTGAACATTCT  
GCTTTTCATGGGGTACATGACAAAGACAACCTGGCAATTGTGACCAGTGGTGCAGGGGCAGCAGCCTC  
TACAAACACCTGCATGTCCAGGAGACCAAGTTTCAGATGTTCCAGCTAATTGACATTGCCCGGCAGACGG  
CTCAGGGAATGGACTATTTGCATGCAAAGAACATCATCCATAGAGACATGAAATCCAACAATATATTTCT  
CCATGAAGGCTTAACAGTGAATAATTGGAGATTTTGGTTTTGGCAACAGTAAAGTACGCTGGAGTGGTTCT  
CAGCAGGTTGAACAACCTACTGGCTCTGTCTCTGGATGGCCCCAGAGGTGATCCGAATGCAGGATAACA  
ACCCATTCAGTTTCCAGTCGGATGTCTACTCCTATGGCATCGTATTGTATGAACTGATGACGGGGGAGCT  
TCCTTATTCTCACATCAACAACCGAGATCAGATCATCTTCATGGTGGGCCGAGGATATGCCTCCCCAGAT  
CTTAGTAAGCTATATAAGAAGTGCCTCAAGCAATGAAGAGGCTGGTAGCTGACTGTGTGAAGAAAGTAA  
AGGAAGAGAGGCCTCTTTTTCCCAGATCCTGTCTTCCATTGAGCTGCTCCAACACTCTCTACCGAAGAT  
CAACCGGAGCGCTTCCGAGCCATCCTTGCATCGGGCAGCCACACTGAGGATATCAATGCTTGCACGCTG  
ACCACGTCCCCGAGGCTGCCTGTCTTCTAG

**Figure S1. Coding sequence of truncated Raf1 (Raf1-tr) with exon 11 highlighted in red**
