# Supplementary material
Source: PubMed Central journal article supplement (PMC6355065)
Supplement: fj.201800336R.sf3.pdf [file fj.201800336R.sf3.pdf]

# Figure S3

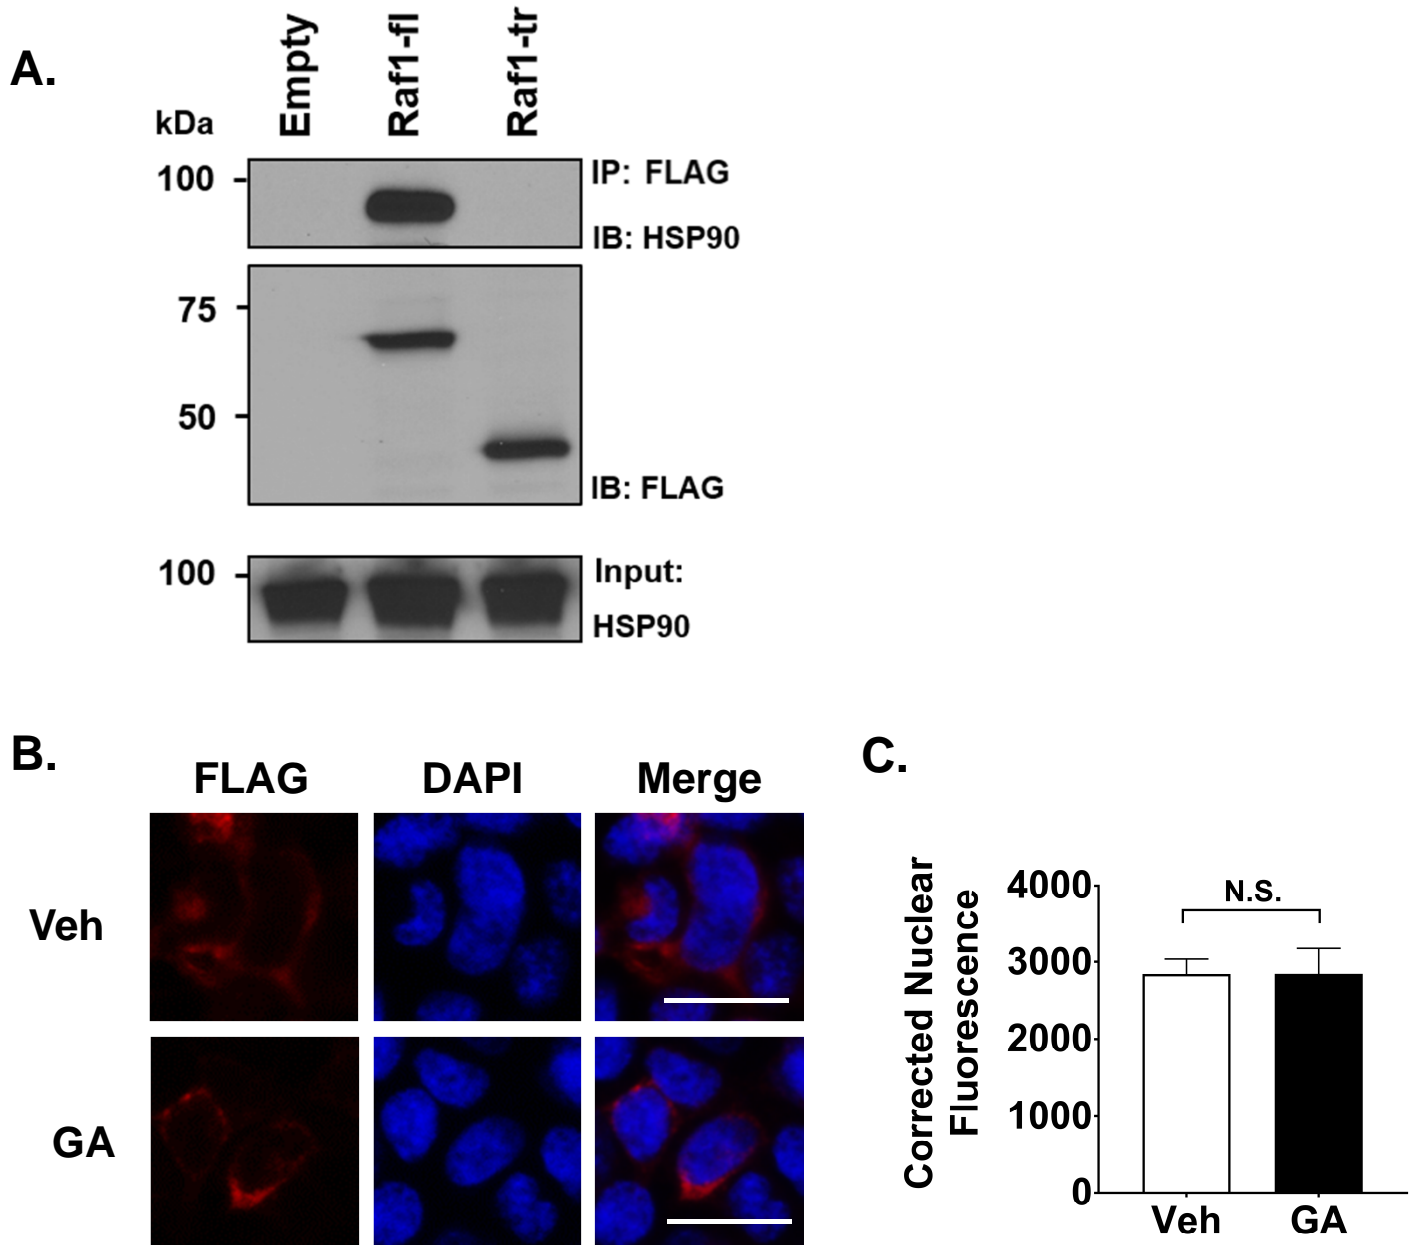

## Figure S3. Hsp90 inhibition fails to induce Raf1-fl nuclear translocation

(A) FLAG-tagged Raf1 (Raf1-fl) or truncated Raf1 (Raf1-tr) were expressed in HEK cells with subsequent FLAG immunoprecipitation and western blot for Hsp90. (B) Measurement of Raf1-fl cellular localization following vehicle (top, Veh) or 1 $\mu$ M geldanamycin (bottom, GA) exposure for eight hours. Red- FLAG immunofluorescence. Blue- DAPI. Scale bars, 25  $\mu$ m. Images are representative of experiments run in triplicate. (C) Quantitation of nuclear Raf1-fl localization by corrected nuclear fluorescence calculation. A minimum of 300 cells per group were analyzed. The results are shown as mean $\pm$ s.e.m.
