# Supplementary material
Source: PubMed Central journal article supplement (PMC6355065)
Supplement: fj.201800336R.sf4.pdf [file fj.201800336R.sf4.pdf]

## Figure S4

**A.**

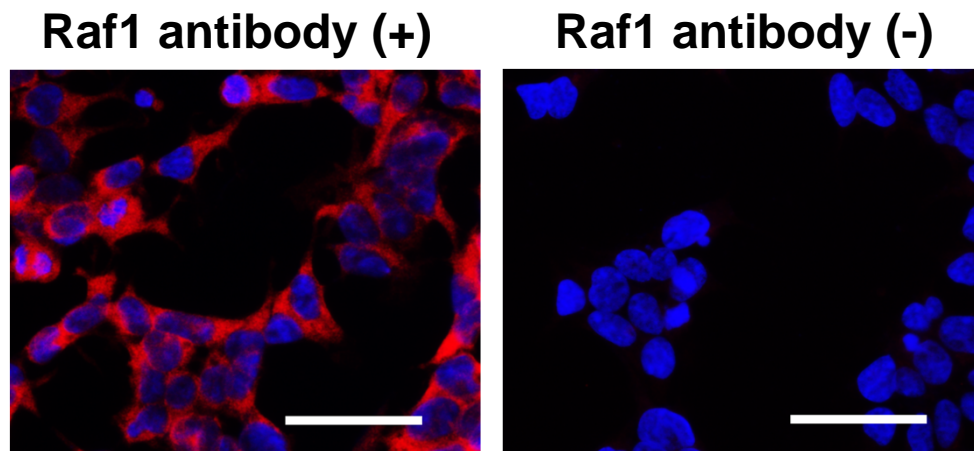

**Red: Raf1**  
**Blue: DAPI**

**B.**

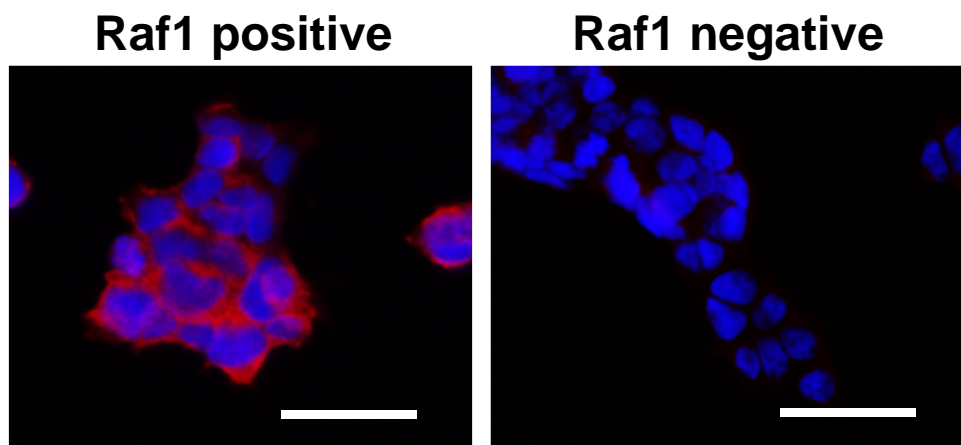

**Red: Raf1**  
**Blue: DAPI**

### Figure S4. Validation of Raf1 antibody for immunofluorescence

(A) Immunofluorescence of HEK cells using a Raf1 primary antibody (BD 610151) (left, +) or no Raf1 primary antibody (right, -). Both samples exposed to secondary antibody tagged with Alexa Fluor 594. Red- Raf1, Blue- DAPI. Scale bars, 50  $\mu$ m. (B) Raf1 immunofluorescence in HAP1 cells that express Raf1 (left, Raf1 positive) or are deficient in Raf1 (right, Raf1 negative). Blue- DAPI. Scale bars, 25  $\mu$ m.
