# Supplementary material
Source: PubMed Central journal article supplement (PMC6355065)
Supplement: fj.201800336R.sf5.pdf [file fj.201800336R.sf5.pdf]

## Figure S5

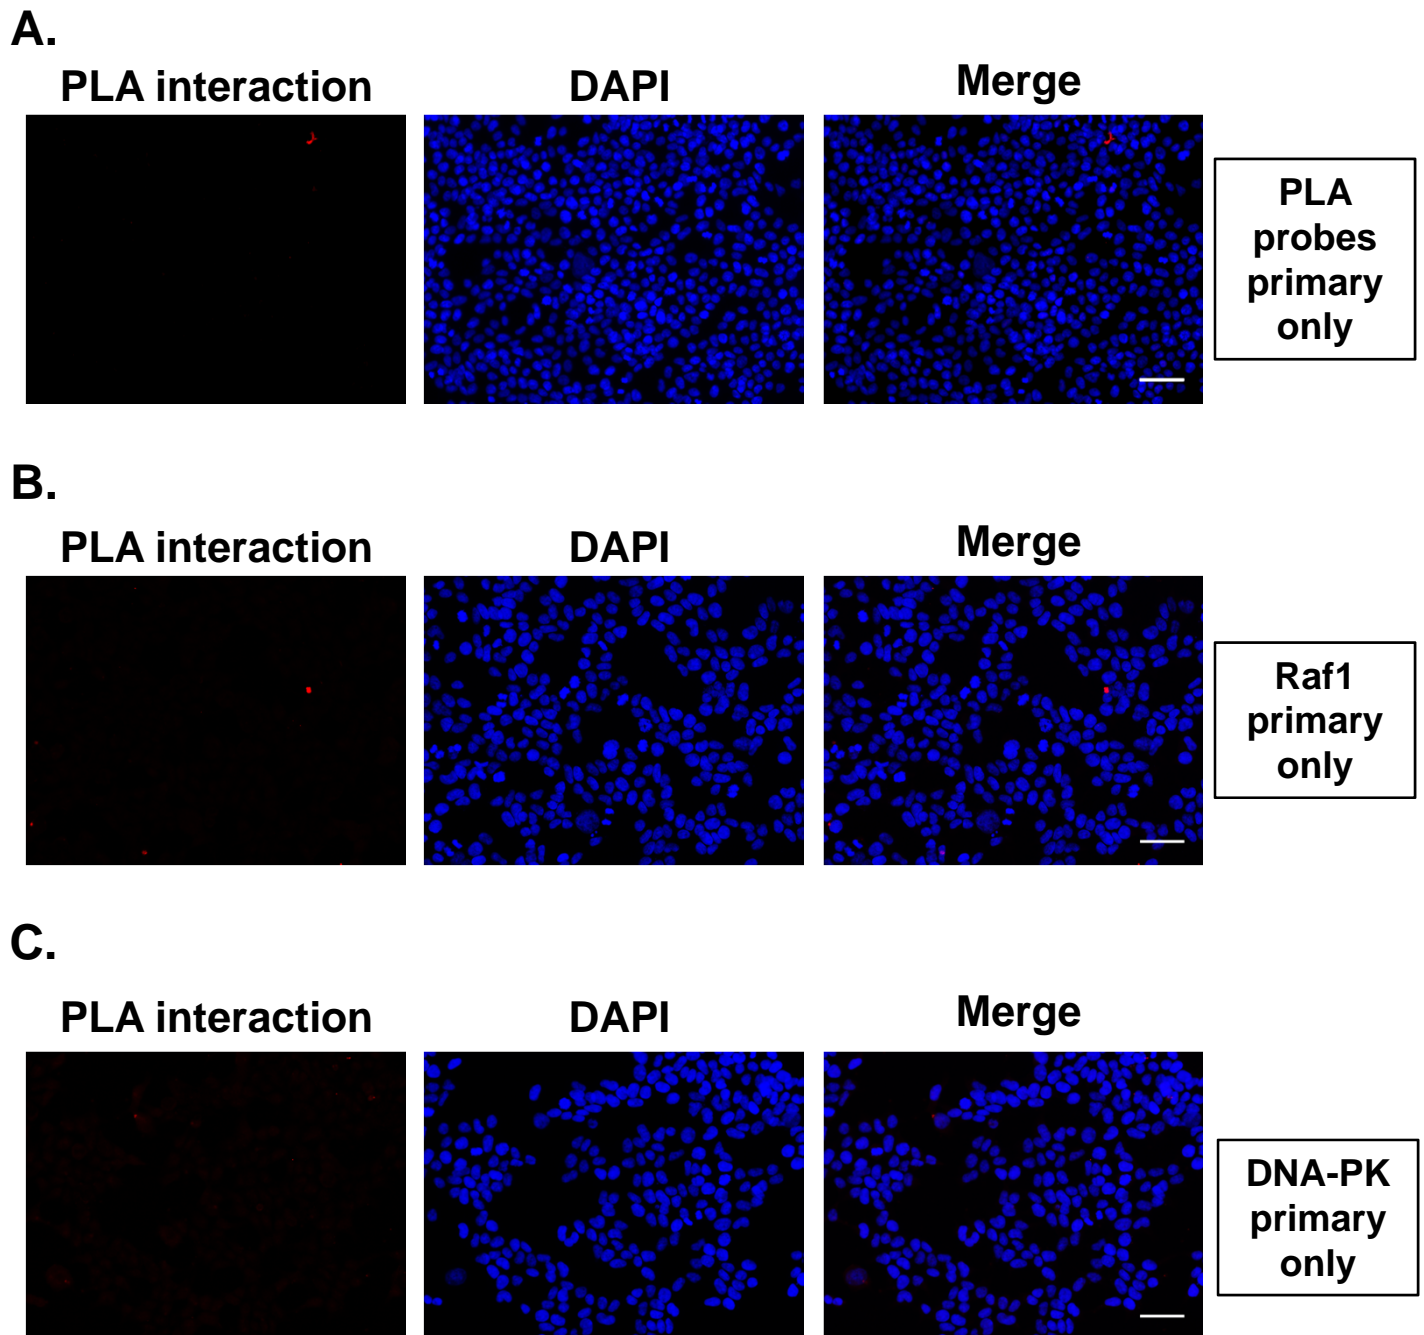

### Figure S5. Proximity ligation assay control reactions

(A) Proximity ligation assay in HEK cells containing only the proximity ligation assay (PLA) probes. Interactions are shown in red with nuclei (blue) counterstained with DAPI. Scale bar, 50  $\mu\text{m}$ . (B) Proximity ligation assay in HEK cells containing only the Raf1 primary antibody and PLA probes. Interactions are shown in red with nuclei (blue) counterstained with DAPI. Scale bar, 50  $\mu\text{m}$ . (C) Proximity ligation assay in HEK cells containing only the DNA-PK primary antibody and PLA probes. Interactions are shown in red with nuclei (blue) counterstained with DAPI. Scale bar, 50  $\mu\text{m}$ .
