# Supplementary material
Source: PubMed Central journal article supplement (PMC6355065)
Supplement: fj.201800336R.sf7.pdf [file fj.201800336R.sf7.pdf]

# Figure S7

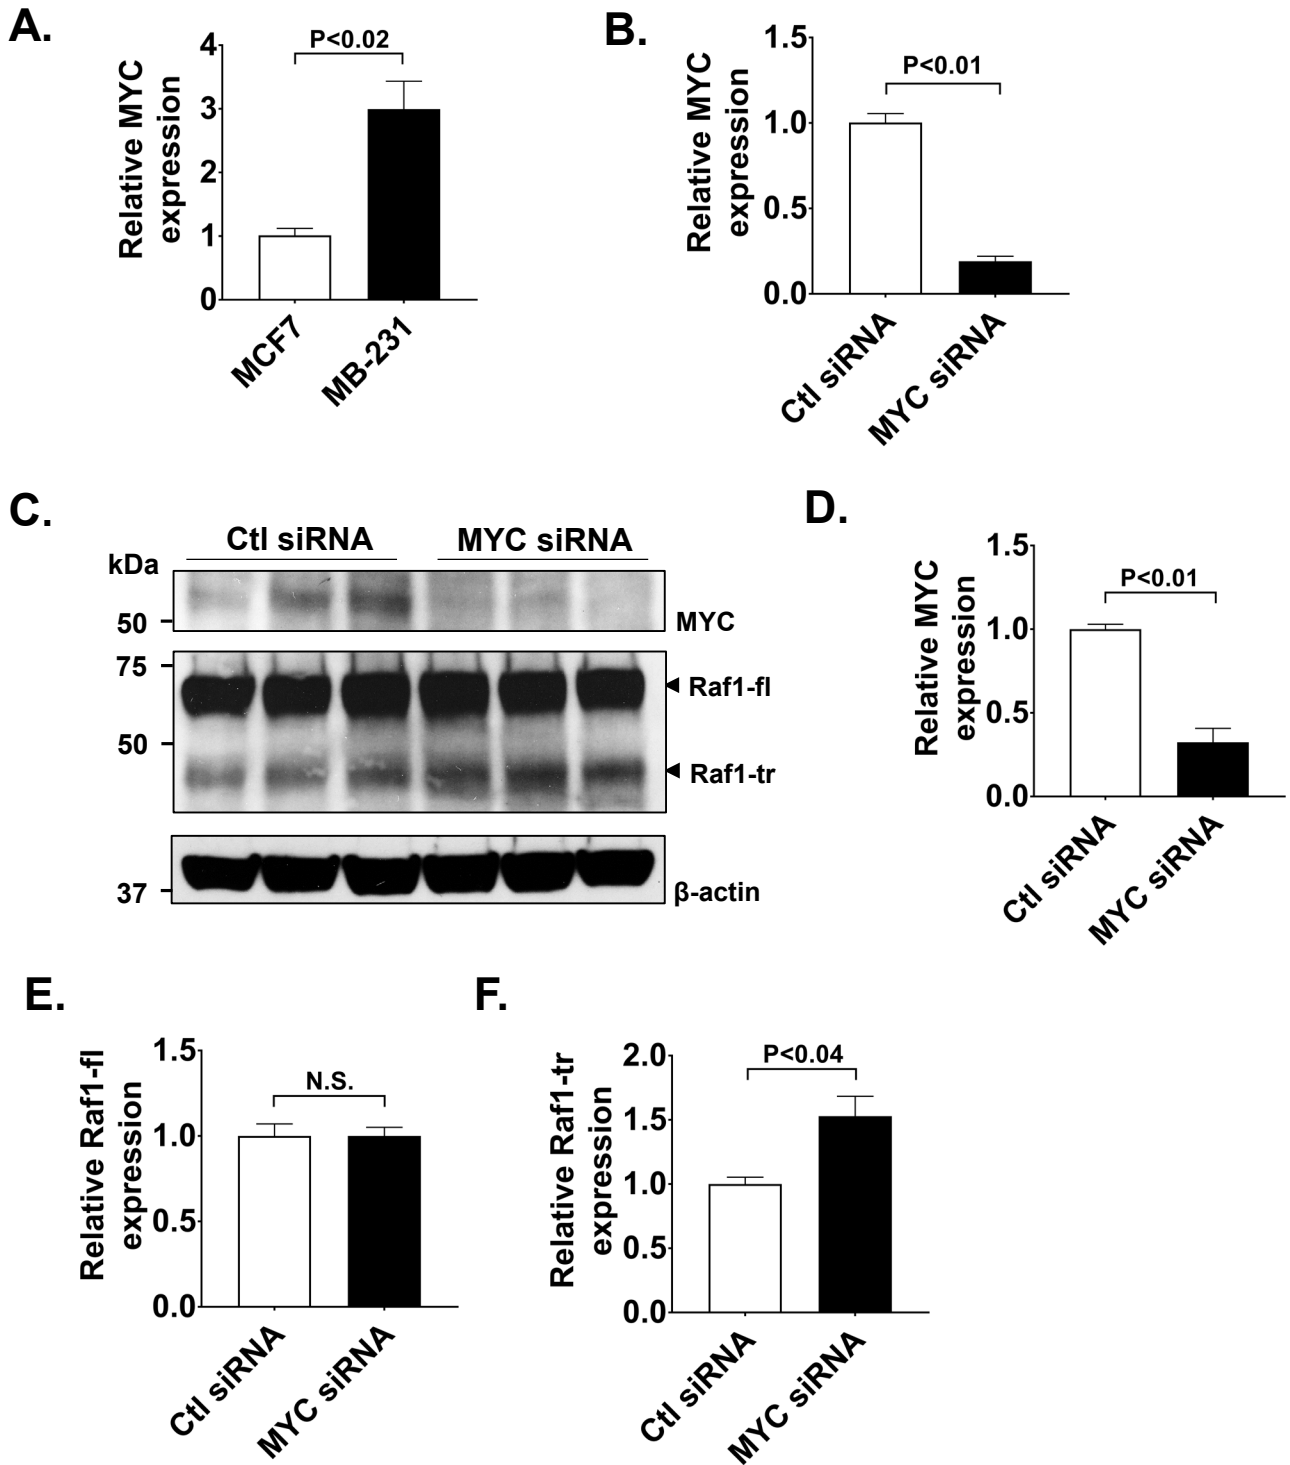

**Figure S7. Knockdown of MYC induces expression of Raf1-tr**

(A) Measurement of MYC gene expression in MCF7 and MB-231 mammary adenocarcinoma cell lines. The gene of interest was normalized to GAPDH expression and represented as fold change relative to MCF7 cells. (B) Measurement of MYC gene expression in MB-231 cells exposed to control (Ctl) or MYC siRNA. The gene of interest was normalized to GAPDH expression and represented as fold change relative to Ctl siRNA. (C) Western blot of MYC and Raf1 following siRNA knockdown of MYC in HEK cells.  $\beta$ -actin was used as a loading control. (D-F) Quantitation of MYC (D), full-length Raf1 (Raf1-fl) (E), and truncated Raf1 (Raf1-tr) (F) protein expression following MYC knockdown. The results are shown as mean  $\pm$  s.e.m.
